# Supplementary material for: Understanding sex-related differences in healthcare utilisation among patients with inflammatory arthritis: a population-based study
Source: HighWire-hosted journal article supplement (doi:10.1136/ard-2022-222779), 2022-09-21
Supplement: ard-2022-222779supp001_data_supplement.pdf [file ard-2022-222779supp001_data_supplement.pdf]

**Supplementary materials**

Supplementary Table 1. Case definitions for identifying cohorts of inflammatory arthritis

| <b>Type of Inflammatory Arthritis</b> | <b>Administrative Data Case Definition</b>                                                                                                                                                                             |
|---------------------------------------|------------------------------------------------------------------------------------------------------------------------------------------------------------------------------------------------------------------------|
| Rheumatoid Arthritis (RA)             | 3 OHIP diagnosis codes for RA (714) in 2 years with at least 1 by a rheumatologist or internal medicine specialist                                                                                                     |
| Ankylosing Spondylitis (AS)           | 3 OHIP diagnosis codes for AS (720) in 2 years with at least 1 by a rheumatologist or internal medicine specialist                                                                                                     |
| Psoriatic Arthritis (PsA)             | 3 OHIP diagnosis codes for other seronegative spondyloarthropathies (721) ever with at least 1 by a rheumatologist or internal medicine specialist and 1 OHIP diagnosis code for psoriasis (696) ever by any physician |

Supplementary Table 2. OHIP codes (diagnosis / fee) for visits to physicians

| Diagnosis /Fee codes                                                                                                 | Description                                                                                          |
|----------------------------------------------------------------------------------------------------------------------|------------------------------------------------------------------------------------------------------|
| <b>Visits to family physicians and specialists for non-specific MSK symptoms (diagnosis codes) before index date</b> |                                                                                                      |
| 274                                                                                                                  | gout                                                                                                 |
| 714*                                                                                                                 | rheumatoid arthritis, Still's disease                                                                |
| 715                                                                                                                  | osteoarthritis                                                                                       |
| 716                                                                                                                  | traumatic arthritis                                                                                  |
| 718                                                                                                                  | Joint derangement, recurrent dislocation, ankylosis, meniscus or cartilage tear, loose body in joint |
| 720*                                                                                                                 | ankylosing spondylitis                                                                               |
| 721*                                                                                                                 | other seronegative spondyloarthropathies                                                             |
| 722                                                                                                                  | intervertebral disc disorder                                                                         |
| 724                                                                                                                  | lumbar strain, lumbago, coccydynia, sciatica                                                         |
| 725                                                                                                                  | lumbar disc disease                                                                                  |
| 726                                                                                                                  | spur                                                                                                 |
| 727                                                                                                                  | synovitis, tenosynovitis, bursitis, bunion, ganglion                                                 |
| 728                                                                                                                  | Dupuytren's contracture                                                                              |
| 729                                                                                                                  | fibrositis, myositis, muscular rheumatism                                                            |
| 734                                                                                                                  | flat foot, pes planus                                                                                |
| 735                                                                                                                  | hallux valgus, hallux varus, hammer toe                                                              |
| 737                                                                                                                  | scoliosis, kyphosis, lordosis                                                                        |
| 739                                                                                                                  | other disease of MSK system and connective tissue                                                    |
| 781                                                                                                                  | leg cramps, leg pain, muscle pain, joint pain, arthralgia, joint swelling, masses                    |
| 840                                                                                                                  | sprain of the shoulder, upper arm                                                                    |
| 841                                                                                                                  | sprain of the elbow                                                                                  |
| 842                                                                                                                  | sprain of the wrist, hand, fingers                                                                   |
| 843                                                                                                                  | sprain of the sacro-iliac, strain - hip                                                              |
| 844                                                                                                                  | Strain of the knee, leg                                                                              |
| 845                                                                                                                  | Strain of the ankle, foot, toes                                                                      |
| 847                                                                                                                  | Strain of the neck, low back, coccyx                                                                 |
| 848                                                                                                                  | Other sprains and strains                                                                            |
| <b>Visits to Emergency Departments for non-specific MSK symptoms (diagnosis codes) before index date</b>             |                                                                                                      |
| M10.4-M10.9                                                                                                          | gout                                                                                                 |
| M13.0-M13.9                                                                                                          | poly- mono-arthritis unspecified                                                                     |
| M15.0-M15.9                                                                                                          | polyarthrosis                                                                                        |
| M16.0-M16.9                                                                                                          | arthrosis of hip                                                                                     |
| M17.0-M17.9                                                                                                          | arthrosis of knee                                                                                    |
| M18.0-M18.9                                                                                                          | arthrosis of the first CMC                                                                           |
| M19.0-M19.9                                                                                                          | other arthrosis                                                                                      |
| M20.0-M20.6                                                                                                          | deformities of the fingers/toes                                                                      |
| M21.0-M21.9                                                                                                          | other deformities of limbs                                                                           |
| M24.0-M24.9                                                                                                          | other joint derangement                                                                              |

|                                                              |                                                    |
|--------------------------------------------------------------|----------------------------------------------------|
| M25.4-M25.9                                                  | Effusion, pain and stiffness in joint              |
| M40-M43                                                      | deforming dorsopathies                             |
| M46-M48                                                      | spondylopathies                                    |
| M54.1-M54.9                                                  | Dorsalgia                                          |
| M65.2-M65.9                                                  | tendon abnormalities                               |
| M67.0-M67.9                                                  | other disorders of synovium                        |
| M70.0-M70.9                                                  | other soft tissue disorder                         |
| M71.2-M71.9                                                  | bursa disorder                                     |
| M75.0-M75.9                                                  | Shoulder lesions                                   |
| M76.0-M76.9                                                  | enthesopathies of lower limbs                      |
| M77.0-M77.9                                                  | other enthesopathies                               |
| M79.0, M79.6-M79.9                                           | other soft tissue disorder                         |
| S13.4, S13.6                                                 | strain/sprain of cervical spine                    |
| S23.1-S23.5                                                  | strain/sprain of joints/ligaments of thorax        |
| S33.1-S33.7                                                  | strain/sprain of joints of the lumbar spine/pelvis |
| S43.4-S43.7                                                  | strain shoulder                                    |
| S53.4                                                        | strain elbow                                       |
| S63.5-S63.7                                                  | strain wrist/fingers                               |
| S73.1                                                        | strain hip                                         |
| S83.2-S83.6                                                  | strain/sprain knee                                 |
| S93.4-S93.6                                                  | sprain/strain ankle                                |
| <b>Visits to rheumatologist (fee codes) after index date</b> |                                                    |
| A485                                                         | Consultation                                       |
| A590                                                         | Comprehensive rheumatology consultation            |
| A595                                                         | Limited consultation                               |
| A486                                                         | Repeat consultation                                |
| A483                                                         | Medical specific assessment                        |
| A484                                                         | Medical specific re-assessment                     |
| A481                                                         | Complex medical specific re-assessment             |
| A488                                                         | Partial assessment                                 |
| A480                                                         | Complex rheumatology assessment                    |
| K481                                                         | Rheumatoid arthritis management by a specialist    |

\*These codes were excluded when calculating proportion of visits to rheumatologists for non-specific MSK symptoms before index date

Supplementary Table 3. OHIP fee codes for musculoskeletal imaging and laboratory tests

| <b>Fee codes for MSK Imaging</b>                                                   | <b>Description</b>                             |
|------------------------------------------------------------------------------------|------------------------------------------------|
| <b>X-rays</b>                                                                      |                                                |
| X020, X025, X027, X028, X032, X034, X035, X202, X203, X204, X205, X206, X207, X208 | Spine                                          |
| X036, X037, X038, X060                                                             | Hip                                            |
| X065, X224, X225                                                                   | Knee                                           |
| X067, X227                                                                         | Ankle                                          |
| X069, X072, X229, X230                                                             | Foot                                           |
| X046, X048, X210, X212                                                             | Shoulder                                       |
| X050, X051, X214, X215, X216                                                       | Elbow                                          |
| X052, X053, X217, X218                                                             | Wrist                                          |
| X054, X055, X056, X219, X220, X221                                                 | Hand                                           |
| <b>CT scan</b>                                                                     |                                                |
| X127, X412, X413                                                                   | Extremities                                    |
| X128, X415, X416                                                                   | Spine                                          |
| <b>MRI</b>                                                                         |                                                |
| X471, X475, X488, X489                                                             | Extremities                                    |
| X490, X492, X493, X495, X496, X498                                                 | Spine                                          |
| <b>Ultrasound</b>                                                                  |                                                |
| J182                                                                               | Joints                                         |
| <b>Fee codes for Laboratory Tests</b>                                              |                                                |
| L451                                                                               | Erythrocyte Sedimentation Rate (ESR)           |
| L665                                                                               | C-reactive protein (CRP)                       |
| L500                                                                               | Rheumatoid factor (RF)                         |
| L393                                                                               | Complete blood count (CBC)                     |
| L067                                                                               | Serum Creatinine                               |
| L251                                                                               | Blood Urea                                     |
| L222                                                                               | Alanine aminotransferase (ALT)                 |
| L223                                                                               | Aspartate aminotransferase (AST)               |
| L005                                                                               | Albumin                                        |
| L191                                                                               | Alkaline phosphatase                           |
| L445                                                                               | Prothrombin time                               |
| L151                                                                               | Serum Lipid (total)                            |
| L117                                                                               | High density lipoprotein – cholesterol (HDL-C) |
| L243                                                                               | Serum Triglycerides (TG)                       |
| L055                                                                               | Serum Cholesterol                              |

Supplementary Table 4. Visits to Physicians in patients with Rheumatoid Arthritis, by age group and sex of the patients

| Visits to Physicians                                         | 20–65 year-age group |                      |                              | >65 year-age group  |                     |                              |
|--------------------------------------------------------------|----------------------|----------------------|------------------------------|---------------------|---------------------|------------------------------|
|                                                              | Male N (%)           | Female N (%)         | Adjusted Odds Ratio (95% CI) | Male N (%)          | Female N (%)        | Adjusted Odds Ratio (95% CI) |
| <b>Before diagnosis</b>                                      |                      |                      |                              |                     |                     |                              |
| <b>Visits to Family Physicians for MSK reasons</b>           |                      |                      |                              |                     |                     |                              |
| Year 3                                                       | 3,060 (39.1)         | 8,365 (42.2)         | 1.02 (0.97, 1.08)            | <b>1,956 (40.2)</b> | <b>4,102 (46.9)</b> | <b>1.29 (1.20, 1.39)</b>     |
| Year 2                                                       | 3,397 (43.4)         | 9,167 (46.2)         | 1.01 (0.95, 1.06)            | <b>2,214 (45.5)</b> | <b>4,552 (52.1)</b> | <b>1.29 (1.20, 1.39)</b>     |
| Year 1                                                       | 6,201 (79.2)         | 15,828 (79.8)        | 1.00 (0.94, 1.07)            | 3,943 (81.0)        | 7,039 (80.5)        | 0.98 (0.89, 1.07)            |
| <b>Visits to Rheumatologists for non-specific MSK causes</b> |                      |                      |                              |                     |                     |                              |
| Year 3                                                       | <b>364 (4.6)</b>     | <b>1,382 (7.0)</b>   | <b>1.47 (1.30, 1.66)</b>     | <b>276 (5.7)</b>    | <b>813 (9.3)</b>    | <b>1.65 (1.43, 1.90)</b>     |
| Year 2                                                       | <b>504 (6.4)</b>     | <b>1,679 (8.5)</b>   | <b>1.28 (1.15, 1.42)</b>     | <b>400 (8.2)</b>    | <b>1,003 (11.5)</b> | <b>1.41 (1.25, 1.59)</b>     |
| Year 1                                                       | <b>2,070 (26.4)</b>  | <b>5,682 (28.7)</b>  | <b>1.07 (1.01, 1.14)</b>     | 1,557 (32.0)        | 2,811 (32.1)        | 1.00 (0.92, 1.08)            |
| <b>Visits to other MSK-specialists</b>                       |                      |                      |                              |                     |                     |                              |
| Year 3                                                       | 727 (9.3)            | 1,774 (8.9)          | 0.92 (0.83, 1.01)            | <b>643 (13.2)</b>   | <b>1,318 (15.1)</b> | <b>1.15 (1.04, 1.28)</b>     |
| Year 2                                                       | 821 (10.5)           | 2,064 (10.4)         | 0.95 (0.87, 1.04)            | <b>693 (14.2)</b>   | <b>1,386 (15.8)</b> | <b>1.11 (1.01, 1.23)</b>     |
| Year 1                                                       | <b>1,233 (15.7)</b>  | <b>2,892 (14.6)</b>  | <b>0.89 (0.82, 0.96)</b>     | 929 (19.1)          | 1,762 (20.1)        | 1.05 (0.96, 1.15)            |
| <b>Visits to Emergency for MSK reasons</b>                   |                      |                      |                              |                     |                     |                              |
| Year 3                                                       | <b>456 (5.8)</b>     | <b>1,132 (5.7)</b>   | <b>0.85 (0.76, 0.96)</b>     | 252 (5.2)           | 497 (5.7)           | 1.07 (0.91, 1.26)            |
| Year 2                                                       | <b>586 (7.5)</b>     | <b>1,390 (7.0)</b>   | <b>0.82 (0.74, 0.91)</b>     | 335 (6.9)           | 576 (6.6)           | 0.95 (0.83, 1.10)            |
| Year 1                                                       | <b>1,429 (18.2)</b>  | <b>3,013 (15.2)</b>  | <b>0.71 (0.66, 0.76)</b>     | <b>898 (18.4)</b>   | <b>1,420 (16.2)</b> | <b>0.84 (0.76, 0.92)</b>     |
| <b>After diagnosis</b>                                       |                      |                      |                              |                     |                     |                              |
| <b>Visits to Rheumatologists</b>                             |                      |                      |                              |                     |                     |                              |
| Year 1                                                       | <b>6,090 (78.4)</b>  | <b>16,097 (81.4)</b> | <b>1.23 (1.15, 1.31)</b>     | <b>3,691 (78.2)</b> | <b>6,885 (80.5)</b> | <b>1.17 (1.07, 1.28)</b>     |
| Year 2                                                       | <b>5,091 (66.0)</b>  | <b>14,013 (71.1)</b> | <b>1.33 (1.25, 1.41)</b>     | <b>3,112 (68.6)</b> | <b>5,889 (70.9)</b> | <b>1.12 (1.04, 1.22)</b>     |
| Year 3                                                       | <b>4,670 (61.0)</b>  | <b>12,998 (66.2)</b> | <b>1.31 (1.24, 1.39)</b>     | <b>2,703 (62.7)</b> | <b>5,286 (66.0)</b> | <b>1.17 (1.09, 1.27)</b>     |

Note: CI, Confidence Interval; MSK, Musculoskeletal

Supplementary Table 5. Visits to Physicians in patients with Ankylosing Spondylitis, by age group and sex of the patients

| Visits to Physicians                                         | 20–65 year-age group |                     |                                 | >65 year-age group |                   |                                 |
|--------------------------------------------------------------|----------------------|---------------------|---------------------------------|--------------------|-------------------|---------------------------------|
|                                                              | Male<br>N (%)        | Female<br>N (%)     | Adjusted Odds<br>Ratio (95% CI) | Male<br>N (%)      | Female<br>N (%)   | Adjusted Odds<br>Ratio (95% CI) |
| <b>Before diagnosis</b>                                      |                      |                     |                                 |                    |                   |                                 |
| <b>Visits to Family Physicians for MSK reasons</b>           |                      |                     |                                 |                    |                   |                                 |
| Year 3                                                       | 1,406 (40.6)         | 1,668 (46.2)        | 0.99 (0.90, 1.10)               | <b>251 (47.4)</b>  | <b>300 (54.7)</b> | <b>1.33 (1.04, 1.70)</b>        |
| Year 2                                                       | 1,510 (43.6)         | 1,828 (50.6)        | 1.06 (0.96, 1.17)               | <b>226 (42.7)</b>  | <b>293 (53.5)</b> | <b>1.57 (1.22, 2.01)</b>        |
| Year 1                                                       | <b>2,598 (75.1)</b>  | <b>2,608 (72.2)</b> | <b>0.78 (0.69, 0.87)</b>        | 382 (72.2)         | 374 (68.2)        | 0.83 (0.64, 1.08)               |
| <b>Visits to Rheumatologists for non-specific MSK causes</b> |                      |                     |                                 |                    |                   |                                 |
| Year 3                                                       | <b>162 (4.7)</b>     | <b>358 (9.9)</b>    | <b>1.83 (1.50, 2.24)</b>        | <b>36 (6.8)</b>    | <b>112 (20.4)</b> | <b>3.56 (2.38, 5.30)</b>        |
| Year 2                                                       | <b>173 (5.0)</b>     | <b>412 (11.4)</b>   | <b>2.03 (1.68, 2.46)</b>        | <b>42 (7.9)</b>    | <b>123 (22.4)</b> | <b>3.35 (2.30, 4.88)</b>        |
| Year 1                                                       | <b>719 (20.8)</b>    | <b>1,128 (31.2)</b> | <b>1.53 (1.37, 1.71)</b>        | <b>123 (23.3)</b>  | <b>172 (31.4)</b> | <b>1.52 (1.16, 2.00)</b>        |
| <b>Visits to other MSK-specialists</b>                       |                      |                     |                                 |                    |                   |                                 |
| Year 3                                                       | 225 (6.5)            | 314 (8.7)           | 1.06 (0.88, 1.27)               | <b>68 (12.9)</b>   | <b>104 (19.0)</b> | <b>1.53 (1.09, 2.15)</b>        |
| Year 2                                                       | 255 (7.4)            | 374 (10.4)          | 1.15 (0.97, 1.37)               | <b>55 (10.4)</b>   | <b>97 (17.7)</b>  | <b>1.79 (1.25, 2.57)</b>        |
| Year 1                                                       | 413 (11.9)           | 476 (13.2)          | 0.91 (0.79, 1.06)               | <b>85 (16.1)</b>   | <b>119 (21.7)</b> | <b>1.43 (1.05, 1.96)</b>        |
| <b>Visits to Emergency for MSK reasons</b>                   |                      |                     |                                 |                    |                   |                                 |
| Year 3                                                       | 171 (4.9)            | 235 (6.5)           | 1.08 (0.88, 1.34)               | 27 (5.1)           | 29 (5.3)          | 1.00 (0.58, 1.74)               |
| Year 2                                                       | 177 (5.1)            | 250 (6.9)           | 1.10 (0.89, 1.35)               | 29 (5.5)           | 31 (5.7)          | 1.04 (0.62, 1.76)               |
| Year 1                                                       | 431 (12.5)           | 424 (11.7)          | 0.76 (0.65, 0.88)               | 53 (10.0)          | 56 (10.2)         | 0.97 (0.65, 1.46)               |
| <b>After diagnosis</b>                                       |                      |                     |                                 |                    |                   |                                 |
| <b>Visits to Rheumatologists</b>                             |                      |                     |                                 |                    |                   |                                 |
| Year 1                                                       | <b>2,765 (80.0)</b>  | <b>2,776 (76.9)</b> | <b>0.87 (0.77, 0.99)</b>        | 357 (68.8)         | 338 (62.8)        | 0.77 (0.59, 1.01)               |
| Year 2                                                       | <b>2,245 (65.2)</b>  | <b>2,428 (67.3)</b> | <b>1.12 (1.01, 1.25)</b>        | <b>277 (55.0)</b>  | <b>334 (62.8)</b> | <b>1.48 (1.14, 1.93)</b>        |
| Year 3                                                       | <b>1,913 (55.7)</b>  | <b>2,123 (59.0)</b> | <b>1.15 (1.04, 1.27)</b>        | <b>241 (50.3)</b>  | <b>311 (59.9)</b> | <b>1.56 (1.20, 2.03)</b>        |

Note: CI, Confidence Interval; MSK, Musculoskeletal  
 Bolded results are statistically significant

Supplementary Table 6. Visits to Physicians in patients with Psoriatic Arthritis, by age group and sex of the patients

| Visits to Physicians                                         | 20–65 year-age group |                     |                                 | >65 year-age group |                   |                                 |
|--------------------------------------------------------------|----------------------|---------------------|---------------------------------|--------------------|-------------------|---------------------------------|
|                                                              | Male<br>N (%)        | Female<br>N (%)     | Adjusted Odds<br>Ratio (95% CI) | Male<br>N (%)      | Female<br>N (%)   | Adjusted Odds<br>Ratio (95% CI) |
| <b>Before diagnosis</b>                                      |                      |                     |                                 |                    |                   |                                 |
| <b>Visits to Family Physicians for MSK reasons</b>           |                      |                     |                                 |                    |                   |                                 |
| Year 3                                                       | 864 (34.8)           | 1,191 (41.9)        | 1.11 (0.99, 1.25)               | <b>189 (39.5)</b>  | <b>309 (48.4)</b> | <b>1.37 (1.07, 1.75)</b>        |
| Year 2                                                       | 995 (40.0)           | 1,265 (44.5)        | 1.00 (0.89, 1.12)               | <b>204 (42.7)</b>  | <b>334 (52.4)</b> | <b>1.33 (1.04, 1.70)</b>        |
| Year 1                                                       | 1,639 (66.0)         | 1,931 (67.9)        | 0.95 (0.84, 1.07)               | 327 (68.4)         | 429 (67.2)        | 0.86 (0.66, 1.12)               |
| <b>Visits to Rheumatologists for non-specific MSK causes</b> |                      |                     |                                 |                    |                   |                                 |
| Year 3                                                       | <b>105 (4.2)</b>     | <b>206 (7.2)</b>    | <b>1.52 (1.19, 1.95)</b>        | <b>24 (5.0)</b>    | <b>78 (12.2)</b>  | <b>2.42 (1.50, 3.90)</b>        |
| Year 2                                                       | <b>118 (4.7)</b>     | <b>244 (8.6)</b>    | <b>1.65 (1.31, 2.07)</b>        | <b>42 (8.8)</b>    | <b>92 (14.4)</b>  | <b>1.64 (1.11, 2.42)</b>        |
| Year 1                                                       | <b>457 (18.4)</b>    | <b>673 (23.7)</b>   | <b>1.22 (1.06, 1.40)</b>        | 127 (26.6)         | 200 (31.3)        | 1.18 (0.91, 1.55)               |
| <b>Visits to other MSK-specialists</b>                       |                      |                     |                                 |                    |                   |                                 |
| Year 3                                                       | 209 (8.4)            | 285 (10.0)          | 0.98 (0.81, 1.19)               | 74 (15.5)          | 104 (16.3)        | 1.00 (0.72, 1.39)               |
| Year 2                                                       | 234 (9.4)            | 321 (11.3)          | 1.00 (0.83, 1.21)               | 66 (13.8)          | 110 (17.2)        | 1.20 (0.86, 1.68)               |
| Year 1                                                       | 352 (14.2)           | 404 (14.2)          | 0.86 (0.73, 1.01)               | 83 (17.4)          | 135 (21.2)        | 1.17 (0.86, 1.59)               |
| <b>Visits to Emergency for MSK reasons</b>                   |                      |                     |                                 |                    |                   |                                 |
| Year 3                                                       | 103 (4.1)            | 140 (4.9)           | 0.95 (0.73, 1.25)               | 28 (5.9)           | 30 (4.7)          | 0.74 (0.43, 1.27)               |
| Year 2                                                       | 108 (4.3)            | 174 (6.1)           | 1.17 (0.91, 1.50)               | 27 (5.6)           | 45 (7.1)          | 1.15 (0.70, 1.88)               |
| Year 1                                                       | <b>267 (10.7)</b>    | <b>292 (10.3)</b>   | <b>0.80 (0.67, 0.96)</b>        | 45 (9.4)           | 70 (11.0)         | 1.09 (0.73, 1.63)               |
| <b>Visits to Dermatologists for psoriasis</b>                |                      |                     |                                 |                    |                   |                                 |
| Year 3                                                       | <b>431 (17.3)</b>    | <b>444 (15.6)</b>   | <b>0.82 (0.71, 0.95)</b>        | 75 (15.7)          | 96 (15.0)         | 0.89 (0.64, 1.25)               |
| Year 2                                                       | <b>483 (19.4)</b>    | <b>453 (15.9)</b>   | <b>0.71 (0.62, 0.82)</b>        | 85 (17.8)          | 91 (14.3)         | 0.75 (0.54, 1.04)               |
| Year 1                                                       | <b>742 (29.9)</b>    | <b>773 (27.2)</b>   | <b>0.82 (0.73, 0.93)</b>        | 103 (21.5)         | 140 (21.9)        | 1.00 (0.74, 1.34)               |
| <b>After diagnosis</b>                                       |                      |                     |                                 |                    |                   |                                 |
| <b>Visits to Rheumatologists</b>                             |                      |                     |                                 |                    |                   |                                 |
| Year 1                                                       | 2,145 (86.5)         | 2,465 (86.7)        | 1.03 (0.88, 1.22)               | 399 (83.8)         | 536 (84.4)        | 1.01 (0.72, 1.40)               |
| Year 2                                                       | <b>1,643 (66.4)</b>  | <b>1,990 (70.1)</b> | <b>1.20 (1.06, 1.35)</b>        | 341 (73.0)         | 457 (73.2)        | 0.98 (0.74, 1.29)               |
| Year 3                                                       | <b>1,561 (63.3)</b>  | <b>1,887 (66.6)</b> | <b>1.16 (1.03, 1.30)</b>        | 307 (67.8)         | 412 (67.9)        | 0.95 (0.73, 1.24)               |
| <b>Visits to Dermatologists for psoriasis</b>                |                      |                     |                                 |                    |                   |                                 |
| Year 1                                                       | 775 (31.2)           | 823 (28.9)          | 0.89 (0.79, 1.00)               | 109 (22.9)         | 136 (21.4)        | 0.88 (0.66, 1.18)               |
| Year 2                                                       | 581 (23.5)           | 635 (22.4)          | 0.91 (0.80, 1.04)               | 84 (18.0)          | 104 (16.7)        | 0.89 (0.64, 1.22)               |
| Year 3                                                       | <b>576 (23.4)</b>    | <b>596 (21.0)</b>   | <b>0.84 (0.74, 0.97)</b>        | 75 (16.6)          | 93 (15.3)         | 0.86 (0.61, 1.20)               |

Note: CI, Confidence Interval; MSK, Musculoskeletal  
 Bolded results are statistically significant

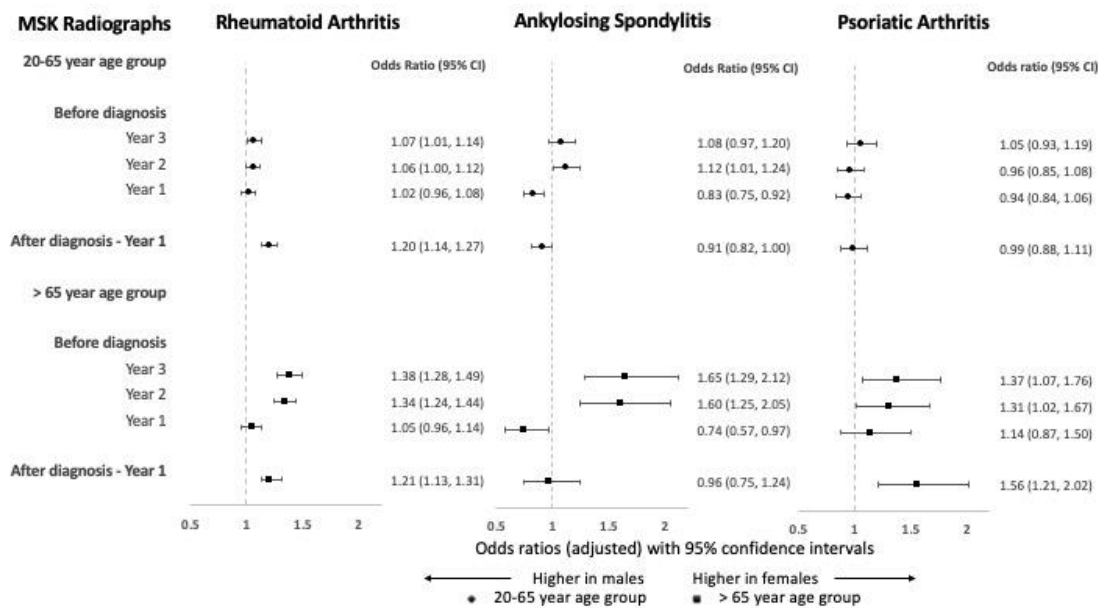

Supplementary Figure 1. Adjusted odds ratios (95% confidence intervals) for musculoskeletal radiographs for female patients compared with male patients by IA and age group. Error bars represent 95% confidence intervals. ORs > 1 indicate higher odds in females and ORs < 1 indicate higher odds in males.
